# Supplementary material
Source: PubMed Central journal article supplement (PMC547842)

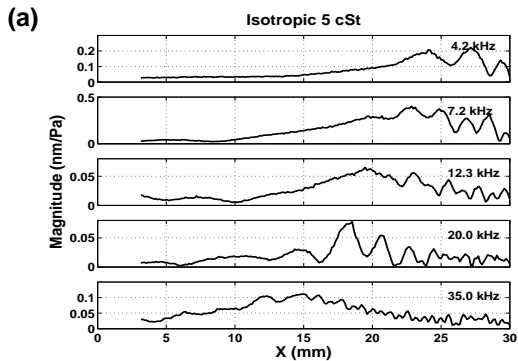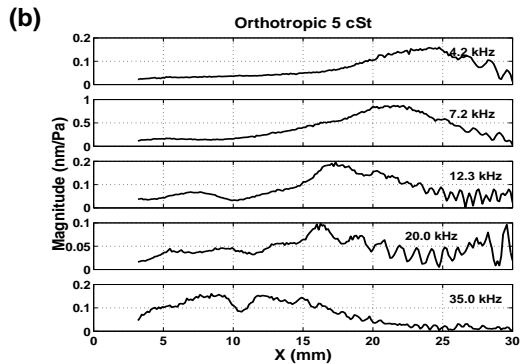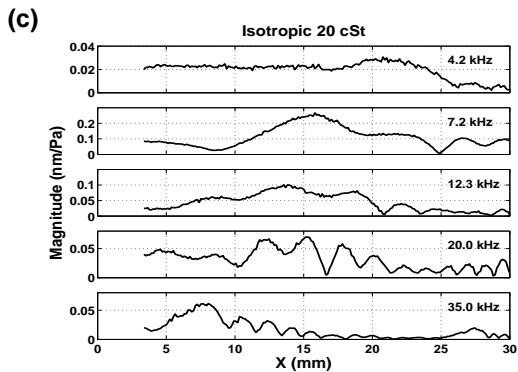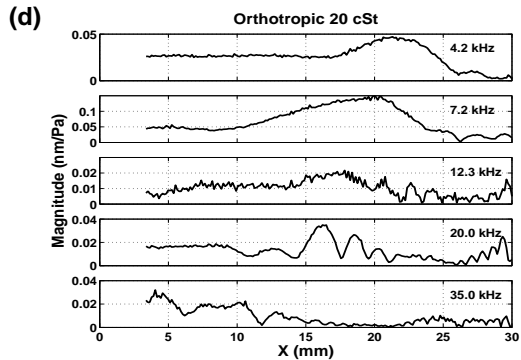

Supplement: pnas_102_5_1296__1.pdf [file pnas_102_5_1296__1.pdf]

### Orthotropic 5 cSt Fluid

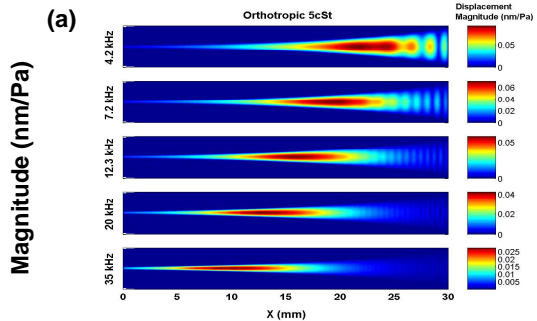

### Orthotropic 20 cSt Fluid

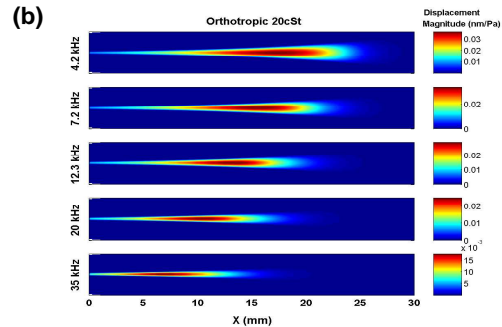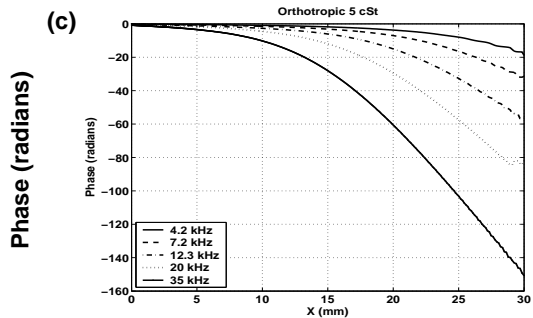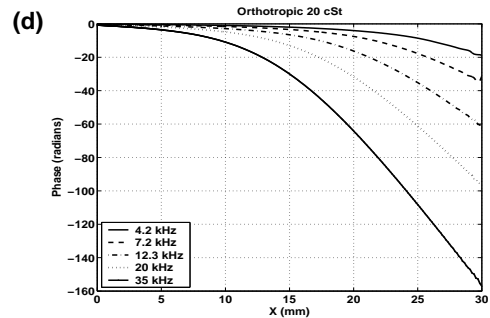

Supplement: pnas_102_5_1296__2.pdf [file pnas_102_5_1296__2.pdf]
